# Supplementary material for: Supporting work participation for adults with hand and upper limb conditions: A survey of the British Association of hand therapists
Source: PubMed Central journal article supplement — Hand Ther. 2024 Mar 17;29(2):75–84. doi: 10.1177/17589983241238424 (PMC11143940; doi:10.1177/17589983241238424), 2024-03-17
Supplement: sj-pdf-2-hth-10.1177_17589983241238424.pdf [file sj-pdf-2-hth-10.1177_17589983241238424.pdf]

## SUPPLEMENTARY FILE 2:

### Comparison of work participation interventions between UK and Australian Hand Therapy Populations

|                                                                                                                                                                                                          | UK<br>n=123 (%) | UK rank | Australia <sup>a</sup><br>n=91 (%) | Australia<br>rank |
|----------------------------------------------------------------------------------------------------------------------------------------------------------------------------------------------------------|-----------------|---------|------------------------------------|-------------------|
| Delivered psychological support (e.g. counselling, reframing, motivation, stress management)                                                                                                             | 89 (72)         | 4       | 78 (86)                            | 3                 |
| Liaised with patient's GP, surgeon or other doctor to provide input for Fit Note certification                                                                                                           | 82 (67)         | 5       | 83 (91)                            | 1                 |
| Directed patient to contact their occupational health service                                                                                                                                            | 95 (77)         | 3       | N/A                                | N/A               |
| Directed patient to discuss with their GP, surgeon or other doctor                                                                                                                                       | 97 (79)         | 2       | N/A                                | N/A               |
| Directly provided an Allied Health Professionals (AHP) Health and Work Report                                                                                                                            | 41 (33)         | 7       | 20 (22) <sup>b</sup>               | 10                |
| Directly provided a Fit Note                                                                                                                                                                             | 32 (26)         | 8       |                                    |                   |
| Discussed graded return to work plans with the patient, including upgrades in hours or duties contingent on specific milestones (e.g. time or recovery progress)                                         | 113 (92)        | 1       | 80 (88)                            | 2                 |
| Designed a written graded return to work plan with the patient to take to their employer with upgrades in hours or duties contingent on specific milestones (separate to the AHP health and work report) | 31 (25)         | 9       | 36 (40)                            | 7                 |
| Liaised directly with patient's employer via phone                                                                                                                                                       | 16 (13)         | 10      | 40 (44)                            | 5                 |
| Liaised directly with patient's employer via email or video call                                                                                                                                         |                 |         | 26 (29)                            | 9                 |
| Liaised directly with patient's occupational health services via email, phone or video call                                                                                                              | 10 (8)          | 13      | N/A                                | N/A               |
| Completed a workplace visit                                                                                                                                                                              | 2 (2)           | 17      | 7 (8)                              | 12                |
| Completed a detailed standardised assessment of work functioning for the employer, occupational health, doctor and/or insurer                                                                            | 6 (5)           | 15      | 7 (8)                              | 12                |
| Provided regular monitoring of a return-to-work programme, adjusting as necessary                                                                                                                        | 19 (15)         | 11      | 48 (53)                            | 4                 |
| When previous work was unsuitable, negotiated alternative duties with an employer                                                                                                                        | 10 (8)          | 13      | 31 (34)                            | 8                 |
| Referred to a specialist vocational rehabilitation service                                                                                                                                               | 17 (14)         | 12      | 38 (42)                            | 6                 |
| Referred to psychological services                                                                                                                                                                       | 61 (50)         | 6       | N/A                                | N/A               |
| Other                                                                                                                                                                                                    | 8 (4)           | 16      | 12 (13)                            | 11                |
| No work advice                                                                                                                                                                                           | 1 (0.8)         | 18      | 2 (2)                              | 14                |

a. O'Brien et al. Hand therapy role in return to work for patients with hand and upper limb conditions. *Journal of Hand Therapy* 2022; 35(2):226-32

b. Return to work certificate
